# Supplementary material
Source: PubMed Central journal article supplement (PMC4996033)
Supplement: mnp-0001-0145-s01.pdf [file mnp-0001-0145-s01.pdf]

## Antidepressants

### USE AS DIRECTED

**bupropion** (Wellbutrin<sup>®</sup>)  
**desvenlafaxine** (Pristiq<sup>®</sup>)  
**selegiline** (Emsam<sup>®</sup>)

### USE WITH CAUTION

**amitriptyline** (Elavil<sup>®</sup>)<sup>[2,5]</sup>  
**citalopram** (Celexa<sup>®</sup>)<sup>[3]</sup>  
**clomipramine** (Anafranil<sup>®</sup>)<sup>[2,5]</sup>  
**escitalopram** (Lexapro<sup>®</sup>)<sup>[3]</sup>  
**imipramine** (Tofranil<sup>®</sup>)<sup>[2,5]</sup>  
**sertraline** (Zoloft<sup>®</sup>)<sup>[3]</sup>  
**trazodone** (Desyrel<sup>®</sup>)<sup>[2]</sup>

### USE WITH INCREASED CAUTION AND WITH MORE FREQUENT MONITORING

**desipramine** (Norpramin<sup>®</sup>)<sup>[2,5]</sup>  
**duloxetine** (Cymbalta<sup>®</sup>)<sup>[2]</sup>  
**fluoxetine** (Prozac<sup>®</sup>)<sup>[2]</sup>  
**fluvoxamine** (Luvox<sup>®</sup>)<sup>[7]</sup>  
**mirtazapine** (Remeron<sup>®</sup>)<sup>[2]</sup>  
**nortriptyline** (Pamelor<sup>®</sup>)<sup>[2,5]</sup>  
**paroxetine** (Paxil<sup>®</sup>)<sup>[4]</sup>  
**venlafaxine** (Effexor<sup>®</sup>)<sup>[3]</sup>

## Antipsychotics

### USE AS DIRECTED

**quetiapine** (Seroquel<sup>®</sup>)  
**ziprasidone** (Geodon<sup>®</sup>)

### USE WITH CAUTION

**clozapine** (Clozaril<sup>®</sup>)<sup>[3]</sup>

### USE WITH INCREASED CAUTION AND WITH MORE FREQUENT MONITORING

**aripiprazole** (Abilify<sup>®</sup>)<sup>[2]</sup>  
**haloperidol** (Haldol<sup>®</sup>)<sup>[2]</sup>  
**olanzapine** (Zyprexa<sup>®</sup>)<sup>[2]</sup>  
**perphenazine** (Trilafon<sup>®</sup>)<sup>[2]</sup>  
**risperidone** (Risperdal<sup>®</sup>)<sup>[2]</sup>

[2]: Serum level may be too low, higher doses may be required.

[3]: Difficult to predict response because of multiple gene variations.

[4]: Genotype suggests less than optimal response.

[5]: Blood levels may be outside of optimal range.

[7]: Serum level may be too low in the presence of CYP1A2 inducers. See page three for additional information.
